# Supplementary material for: Biotic and Climatic Velocity Identify Contrasting Areas of Vulnerability to Climate Change
Source: PLOS journal article supplement (doi:10.1371/journal.pone.0140486), 2015-10-14
Supplement: S2 (10.1371/journal.pone.0140486.s002) [file journal.pone.0140486.s002]

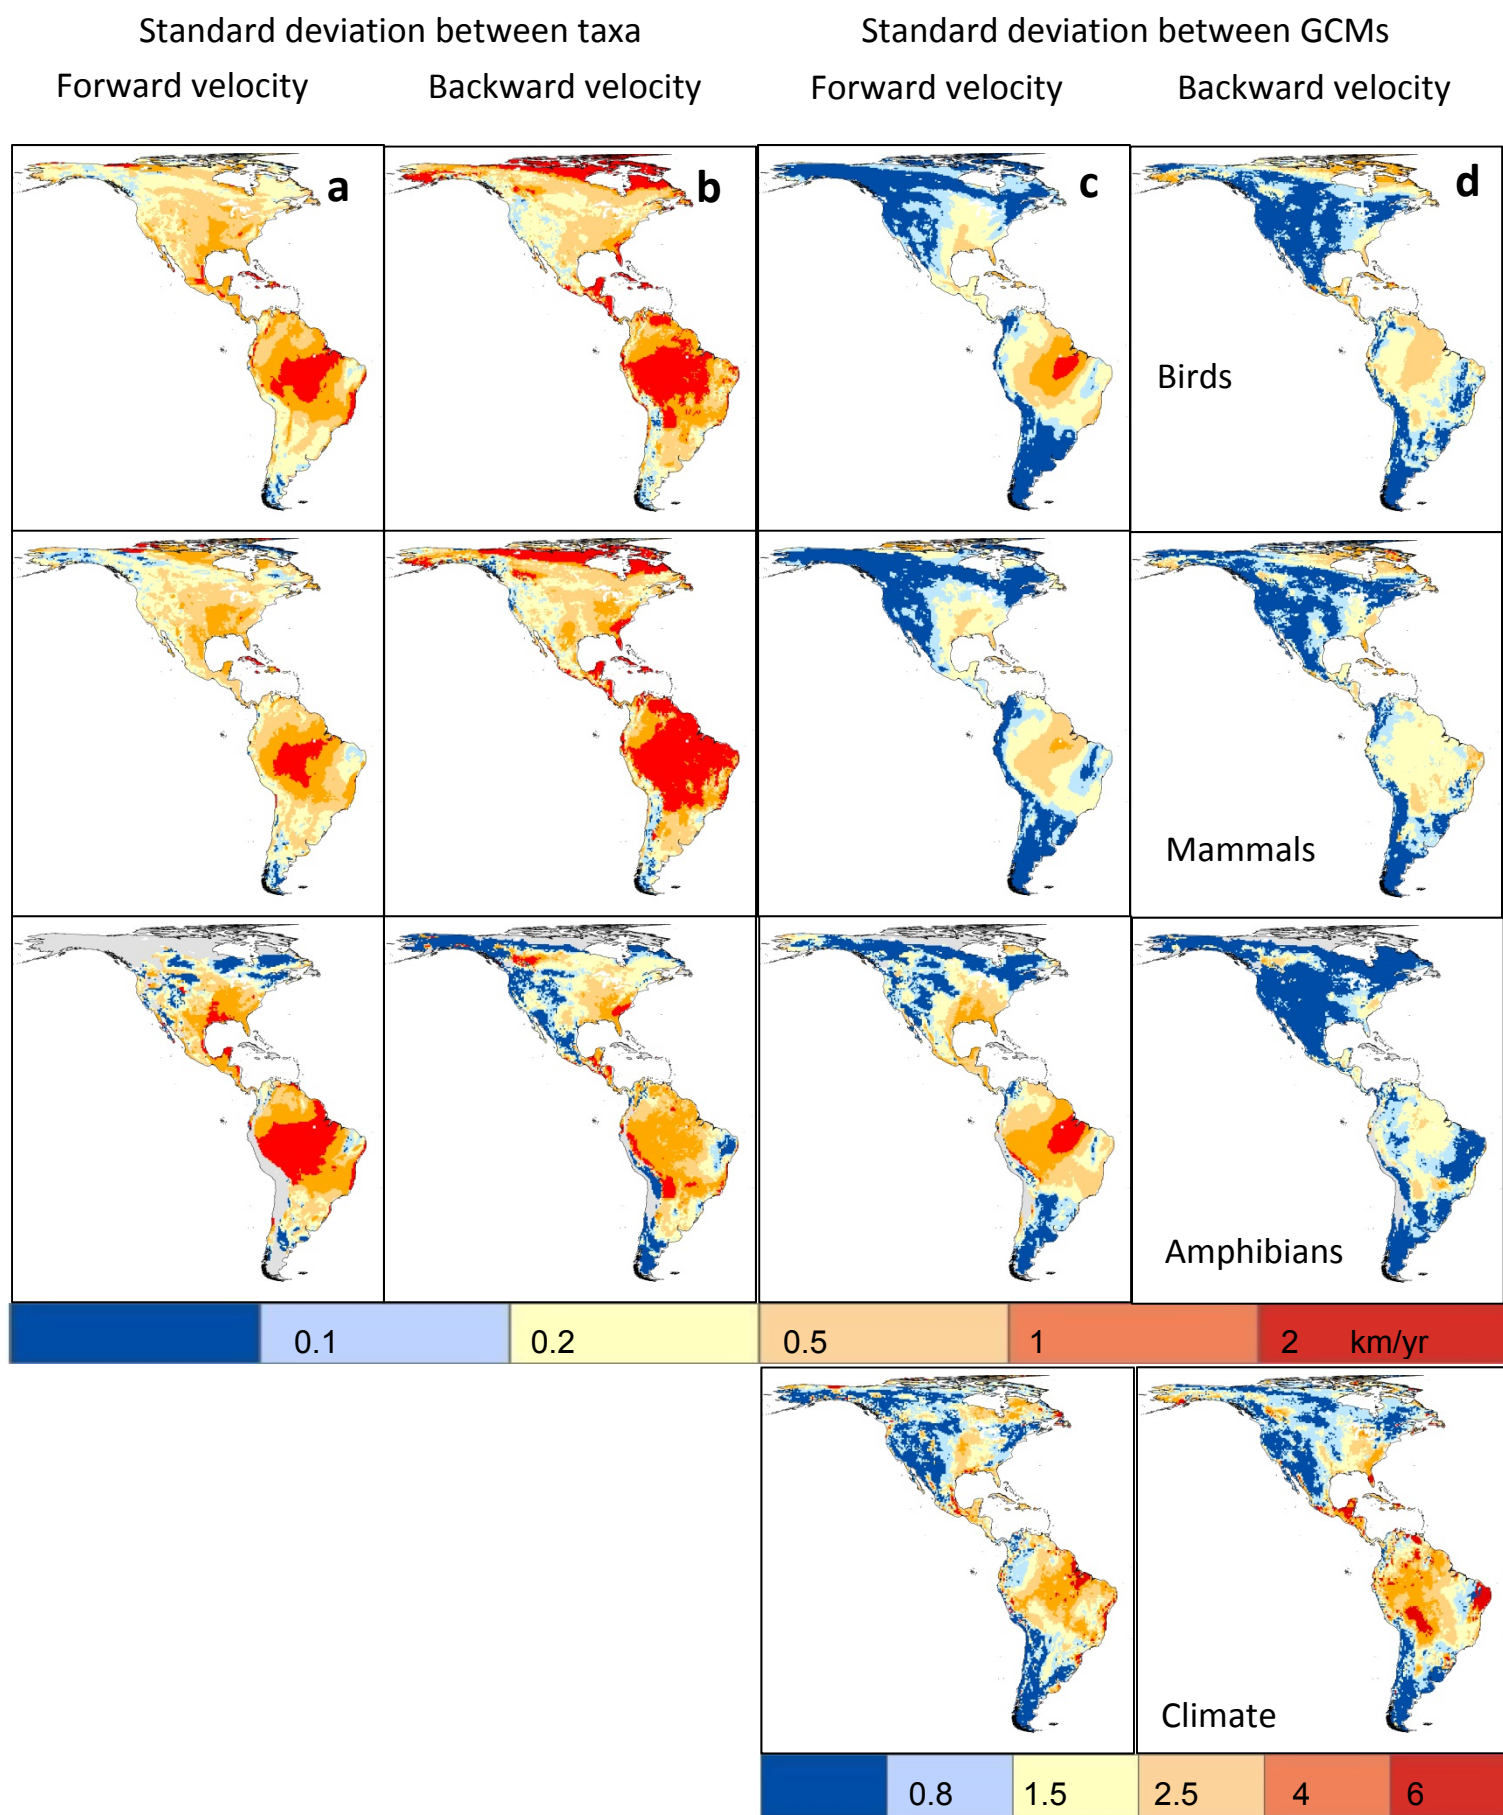

Figure S2. Variation in velocity values (standard deviation, in km/yr) between species within a taxa group (birds, mammals, amphibians), and between mean values for the 10 GCM projections.
